# Supplementary material for: Controversial Role of the Immune Checkpoint OX40L Expression on Platelets in Breast Cancer Progression
Source: Frontiers journal article supplement (doi:10.3389/fonc.2022.917834), 2022-07-08
Supplement: Image_1.pdf [file Image_1.pdf]

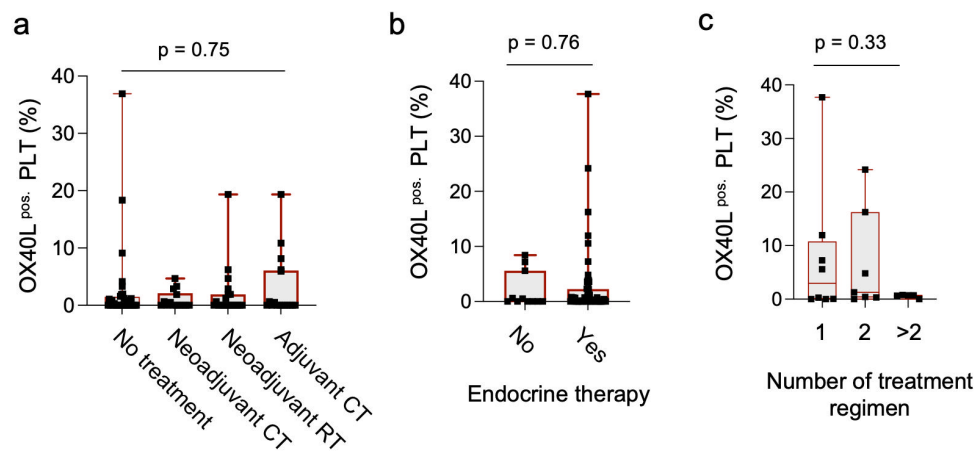

**Suppl. Figure 1: Association of pOX40L and breast cancer treatment**

a Comparative analysis of pOX40L and different breast cancer subtypes. b Association of pOX40L and endocrine therapy. c Correlation of pOX40L and different numbers of treatment regimen.
