# Supplementary material for: Controversial Role of the Immune Checkpoint OX40L Expression on Platelets in Breast Cancer Progression
Source: Frontiers journal article supplement (doi:10.3389/fonc.2022.917834), 2022-07-08
Supplement: Image_2.pdf [file Image_2.pdf]

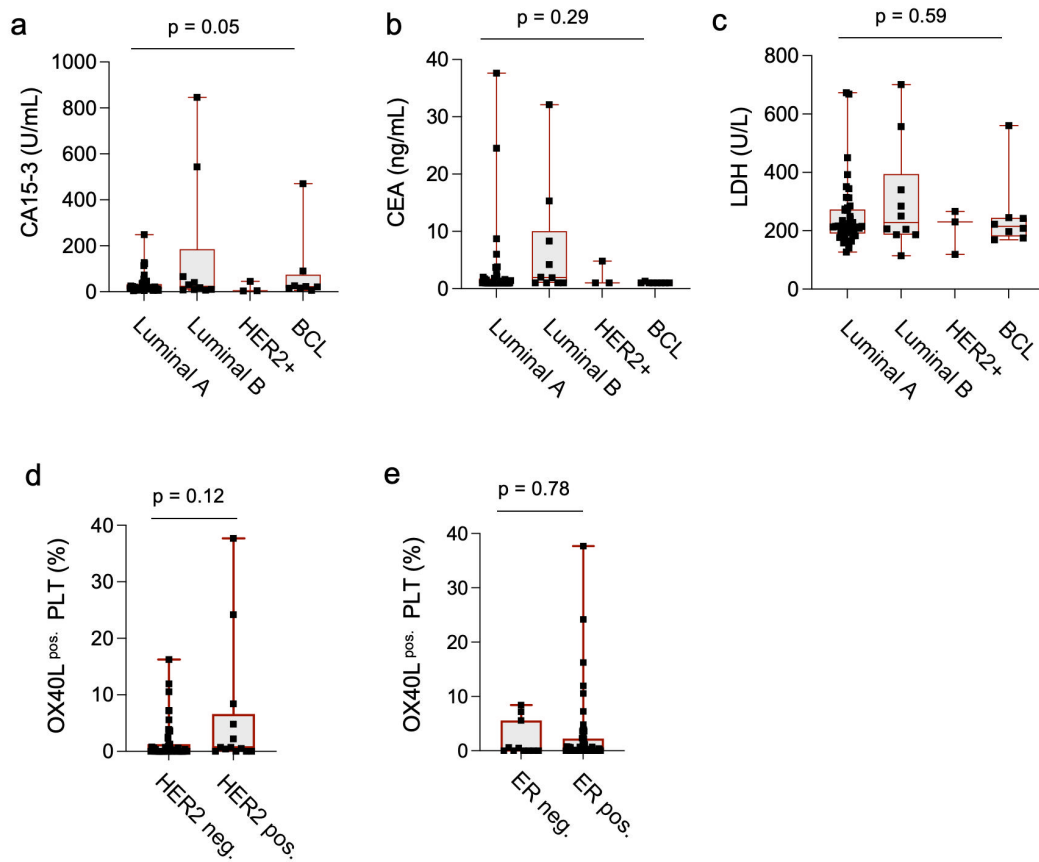

**Suppl. Figure 2: pOX40L expression in different breast cancer subtypes**

Expression of CA15-3 (a), CEA (b) and LDH (c) in different breast cancer subtypes. d pOX40L expression in HER2 positive and negative patients. e pOX40L expression in ER positive vs. ER negative patients. pos. = positive, neg. = negative.
