# Supplementary material for: Controversial Role of the Immune Checkpoint OX40L Expression on Platelets in Breast Cancer Progression
Source: Frontiers journal article supplement (doi:10.3389/fonc.2022.917834), 2022-07-08
Supplement: Image_3.pdf [file Image_3.pdf]

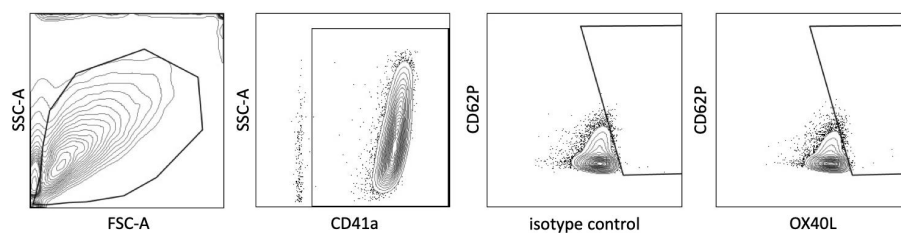

**Suppl. Fig. 3: Gating strategy used to analyze pOX40L expression on platelets**  
 pOX40L levels were assessed by flow cytometry. Platelets were defined as CD41a-positive subcellular fragments and specific staining for OX40L level was analyzed in association with the platelet activation marker P-selectin (CD62P). If not indicated otherwise, data reflect pOX40L expression on all CD41<sup>+</sup> platelets, i.e. activated (CD62P<sup>+</sup>) and resting (CD62P<sup>-</sup>) platelets.
